# Supplementary material for: Association between Six CETP Polymorphisms and Metabolic Syndrome in Uyghur Adults from Xinjiang, China
Source: MDPI journal article supplement (doi:10.3390/ijerph14060653), 2017-06-18
Supplement: s1 [file s1]

# CERTIFICATE OF ENGLISH EDITING

This document certifies that the paper listed below has been edited to ensure that the language is clear and free of errors. The edit was performed by professional editors at Editage, a division of Cactus Communications. The intent of the author's message was not altered in any way during the editing process. The quality of the edit has been guaranteed, with the assumption that our suggested changes have been accepted and have not been further altered without the knowledge of our editors.

## TITLE OF THE PAPER

Association between six CETP polymorphisms and metabolic syndrome in Uyghur adults from Xinjiang, China

## AUTHORS

Huixian Hou, Rulin Ma, Heng Guo, Jia He, Yunhua Hu, Lati Mu, Yizhong Yan, Jiaolong Ma, Shugang Li, Jingyu Zhang, Yusong Ding, Mei Zhang, Qiang Niu, Jiaming Liu and Shuxia Guo\*

## JOB CODE

LDGPD-2

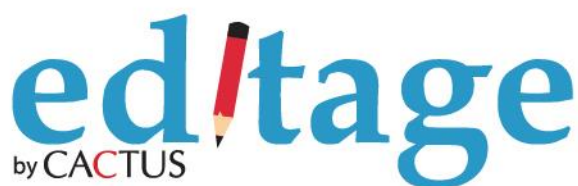

Signature

Vikas Narang

Vikas Narang

Vice President, Author Services, Editage

Date of Issue

Editage, a brand of Cactus Communications, offers professional English language editing and publication support services to authors engaged in over 500 areas of research. Through its community of experienced editors, which includes doctors, engineers, published scientists, and researchers with peer review experience, Editage has successfully helped authors get published in internationally reputed journals. Authors who work with Editage are guaranteed excellent language quality and timely delivery.

CACTUS.

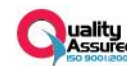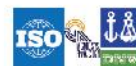

### Contact Editage

#### Worldwide

request@editage.com  
+1 877-334-8243  
www.editage.com

#### Japan

submissions@editage.com  
+81 03-6868-3348  
www.editage.jp

#### Korea

submit-korea@editage.com  
1544-9241 (Free dial)  
www.editage.co.kr

#### China

fabiao@editage.cn  
400-005-6055  
www.editage.cn

#### Brazil

inquiry.brazil@editage.com  
0880-892-20-97  
www.editage.com.br

#### Taiwan

submitjobs@editage.com  
02 2657 0306  
www.editage.com.tw
